# Supplementary material for: Rapid synthesis of a TiO2 hollow microsphere assembly from hollow nanoparticles with enhanced photocatalytic activity
Source: Royal Society of Chemistry journal article supplement (doi:10.1039/c3ra42497a), 2013-01-01
Supplement: c3ra42497a.pdf [file c3ra42497a.pdf]

## Supporting information

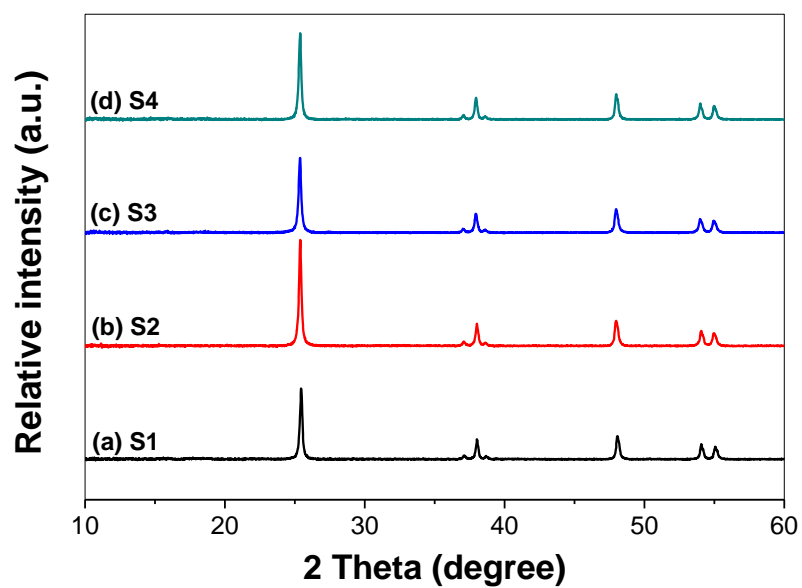

**Fig. S1.** XRD patterns of TiO<sub>2</sub> samples prepared both in the presence of H<sub>2</sub>O<sub>2</sub> and NH<sub>4</sub>F (see Table 1 for information details).

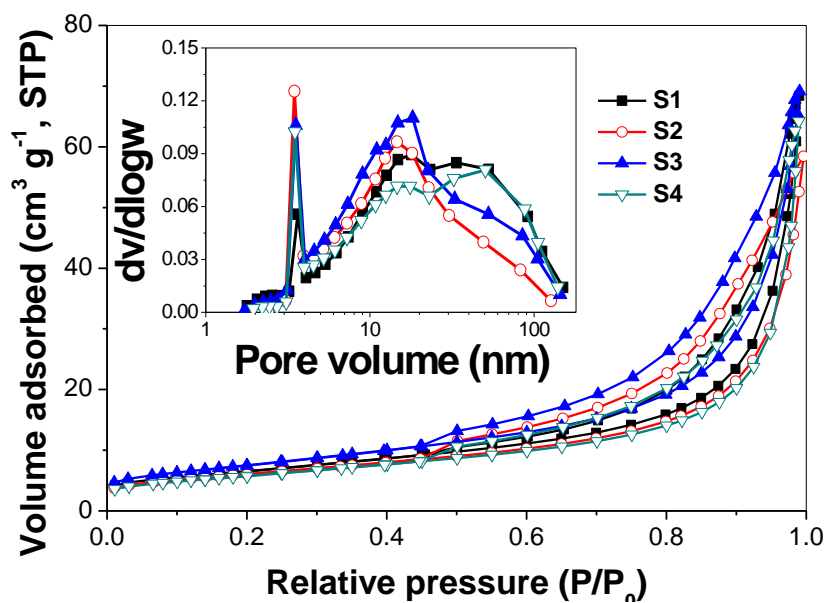

**Fig. S2.** Nitrogen adsorption–desorption isotherms and the corresponding pore size distributions (inset) of TiO<sub>2</sub> samples prepared both in the presence of H<sub>2</sub>O<sub>2</sub> and NH<sub>4</sub>F (see Table 1 for information details).
